## Poster Presentations — B25

### PDGF-Induced DNA Synthesis in Human Lung Fibroblast is Inhibited by Lidocaine

Shamsuddin Akhtar MD\* and Mihai Podgoreanu MD, Anesthesiology, Yale University, New Haven, CT, United States.

**Introduction:** Fibroblasts are intricately involved in the process of inflammation and repair in the lung. Platelet-derived growth factor (PDGF) is a well known mitogen that induces DNA synthesis and proliferation in lung fibroblasts. There is growing evidence that lidocaine (and other local anesthetics) have direct anti-inflammatory and antiproliferative properties. This effect may be useful in acute and chronic inflammatory states as demonstrated by a beneficial role in acute lung injury (in vivo animal model) and possible steroid sparing effect in steroid-dependant asthmatics. This investigation aims to study the effect of lidocaine on PDGF-induced DNA synthesis in human lung fibroblasts (HLF) in the presence or absence of small concentrations of fetal bovine serum (FBS).

**Methods:** We investigated the inhibitory effect of lidocaine on the proliferation of HLF by measuring basal and PDGF-induced DNA synthesis in the presence of lidocaine. Confluent, quiescent, HLF (ATCC;CCL153) were treated with PDGF-BB 10 ng/ml, PDGF-BB 10 ng/ml + 0.25% FBS, PDGF-BB 10 ng/ml + 0.5% FBS, in the absence and presence of lidocaine ( $10^{-5}$ M,  $10^{-4}$ M,  $10^{-3}$ M and  $5 \times 10^{-3}$ M) for 12-16 hours.  $^3$ H-Thymidine incorporation was measured. Data is presented as counts/mg DNA  $\pm$  SEM and analyzed using ANOVA.  $P < 0.01$  considered significant.

**Results:** Lidocaine ( $10^{-5}$ M,  $10^{-4}$ M,  $10^{-3}$ M and  $5 \times 10^{-3}$ M) decreases PDGF-induced DNA synthesis in HLF. The inhibitory effect of lidocaine was observed even in the presence of FBS 0.25% and 0.5% (Table).

| AGENT             | Agent(A)<br>Only | A+Lido<br>$10^{-5}$ M | A+Lido<br>$10^{-4}$ M | A+Lido<br>$10^{-3}$ M | A+Lido<br>$5 \times 10^{-3}$ M | N<br>(*= $p < 0.01$ ) |
|-------------------|------------------|-----------------------|-----------------------|-----------------------|--------------------------------|-----------------------|
| Control (No FBS)  | 337 $\pm$ 44     | 260 $\pm$ 44          | 276 $\pm$ 32          | 240 $\pm$ 30          | 135 $\pm$ 11*                  | 5                     |
| PDGF-BB 10ng/ml   | 962 $\pm$ 44     | 716 $\pm$ 49*         | 709 $\pm$ 32*         | 579 $\pm$ 18*         | 166 $\pm$ 12*                  | 5                     |
| PDGF-BB-0.25% FBS | 507 $\pm$ 86     | 179 $\pm$ 14*         | 144 $\pm$ 11*         | 82 $\pm$ 10*          | 40 $\pm$ 2*                    | 5                     |
| PDGF+0.5% FBS     | 199 $\pm$ 23     | 134 $\pm$ 15*         | 99 $\pm$ 19*          | 66 $\pm$ 4*           | 24 $\pm$ 2*                    | 5                     |

Study Supported by Department of Anesthesiology, Yale University.
